# Coexistence theory and the frequency-dependence of priority effects

Po-Ju Ke <sup>\*1</sup> and Andrew D. Letten <sup>\*1,2</sup>

<sup>1</sup>Department of Biology, Stanford University, Stanford, California,  
94305-5020, USA

<sup>2</sup>University of Canterbury, Christchurch, New Zealand

**Type of article:** Forum  
**Number of words:** 1213  
**References:** 13  
**Figures:** 1  
**Boxes:** 1

---

\*Both authors contributed equally.

Correspondence email: [pojuke@stanford.edu](mailto:pojuke@stanford.edu), [andrewletten@gmail.com](mailto:andrewletten@gmail.com)

## 1 **Abstract**

2 Priority effects encompass a broad suite of ecological phenomena. Several studies  
3 have suggested reframing priority effects around the stabilizing and equalizing  
4 concepts of coexistence theory. We show that the only compatible priority effects  
5 are those characterized by positive frequency dependence.

## 6 Introduction

7 The order species arrive in a locality can have lasting impacts on the diversity,  
8 composition and function of ecological communities [1, 2]. This phenomenon,  
9 alternately referred to as priority effects, alternative/multiple stable states, histor-  
10 ical contingency or founder control, was originally explored analytically through  
11 Lotka-Volterra competition models [3, 4]. In these simple models, priority effects  
12 emerge when competing species have greater negative impacts on heterospecifics  
13 than conspecifics, resulting in each species' growth rate being a positive function  
14 of its relative abundance. From a theoretical perspective, the term priority effect  
15 is thus strictly defined [5], but over time its usage has broadened to encompass a  
16 wider suite of phenomena. Several studies have subsequently mooted the prospect  
17 of reorganizing priority effects around the stabilizing and equalizing concepts of  
18 coexistence theory [6–8]. Here, we identify the unrecognized problems and promise  
19 of such an endeavour.

## 20 The frequency dependence of priority effects

21 According to coexistence theory, species can coexist when the fitness differences  
22 between them are smaller than their niche differences, where the former compares  
23 overall adaptedness to a shared environment, and the latter captures overlap in  
24 resource usage in space and time [9]. This is equivalent to stating that each species  
25 exhibits negative frequency dependence (NFD); i.e., reduced growth as a function  
26 of its own relative abundance in a community. For a two-species Lotka-Volterra  
27 model, this can be summarized via the inequality  $\rho < \frac{f_2}{f_1} < 1/\rho$  (Eq. 1), where  
28 niche overlap,  $\rho$ , is equal to '1 - the niche difference' and is bounded between 0  
29 and 1, and  $\frac{f_2}{f_1}$  is the fitness ratio. It follows that we can differentiate between two  
30 classes of coexistence mechanisms: equalizing mechanisms that reduce the average  
31 fitness difference and stabilizing mechanisms that reduce niche overlap.

32 In addition to being ecologically intuitive, the bounding of niche overlap between 0  
33 and 1 has statistical provenance in Chesson's original definition as the least squares  
34 correlation between the resource utilization functions in MacArthur's consumer-

35 resource model [10]. More recently, however, Chesson provided a convenient for-  
36 mula for niche overlap in terms of a symmetric measure of the ratio of inter-  
37 to intra-specific density dependence based on Lotka-Volterra coefficients,  $\alpha_{ij}$  [11].  
38 Specifically,  $\rho = \sqrt{\frac{\alpha_{12}\alpha_{21}}{\alpha_{11}\alpha_{22}}}$  (Eq. 2). Whether or not a given  $\rho$  generates NFD de-  
39 pends on the fitness difference between competing species, but it is clear from this  
40 formulation that  $\rho$  is bounded by 0 and 1 only when the product of the intra-  
41 specific coefficients is greater than the product of the inter-specific coefficients.  
42 When the reverse is true,  $\rho$  can take values greater than 1.

43 At first glance,  $\rho > 1$  is at odds with both intuitive and statistical interpretations  
44 of niche overlap. However, if we redefine niche difference (i.e.,  $1 - \rho$ ) as a mea-  
45 sure of stabilization potential, it operationalizes the original analytical definition  
46 of priority effects in a form that recognizes the joint role of stabilizing and equaliz-  
47 ing mechanisms. More specifically, the criteria for positive frequency dependence  
48 (PFD), and therefore stable priority effects, is the inverse of the stable coexistence  
49 inequality (Eq. 1), i.e.  $\rho > \frac{f_2}{f_1} > 1/\rho$  (Eq. 3), where  $\rho = 1 -$  stabilization po-  
50 tential [8]. As such, any mechanism that reduces the fitness ratio, or decreases  
51 the stabilization potential, will increase the probability of priority effects. Rather  
52 than being monotonic, note that the stabilization potential diverges around zero  
53 such that values above zero represent the stabilization potential for coexistence,  
54 whereas values below zero represent the stabilization potential for priority effects;  
55 in other words the strength of the attractor towards alternative stable states. We  
56 note that this terminology is different from recent heuristic translations of priority  
57 effects into coexistence theory, where niche differences decreasing below zero has  
58 been referred to as destabilization [6, 7]. However, in keeping with dynamic sys-  
59 tems theory, we favor conceptualizing destabilization as any process that causes  
60 the stabilization potential to approach zero from values above *or* below (Fig 1e in  
61 Box 1).

62 In Box 1 we use Tilman’s consumer-resource model [12] to illustrate that only a  
63 subset of phenomena commonly referred to as priority effects are compatible with  
64 coexistence theory. In particular, compatible phenomena are limited to those that  
65 generate PFD and therefore are consistent with the original definition derived from  
66 Lotka-Volterra [5]. This is not to say that PFD is unique to systems exhibiting

67 point equilibria. For example, the coexistence mechanism relative nonlinearity  
68 can generate PFD when species that benefit from fluctuations in the intensity of  
69 competition also exacerbate those fluctuations [13]. Nevertheless, in a system that  
70 precludes the emergence of positive (or negative) frequency dependence, and hence  
71 the emergence of a non-trivial stable attractor, the stabilization potential term is  
72 unquantifiable. This criterion, however, wholly or partially excludes a number of  
73 phenomena, which for heuristic reasons are also routinely termed priority effects.  
74 We briefly consider two of these phenomena below.

## 75 **Positive density dependence and facilitation**

76 When applying coexistence theory to study priority effects, it is important to rec-  
77 ognize that PFD can emerge from negative ( $\alpha_{ij} > 0$ ) or positive ( $\alpha_{ij} < 0$ ) density  
78 dependence, i.e., facilitation. However, while conceptually compatible with co-  
79 existence theory, the analytical tools currently available (i.e., Eq. 3) cannot be  
80 leveraged to interpret facilitative dynamics. This is because negative  $\alpha_{ij}$  would  
81 generate unbounded population densities unless constrained by specific model de-  
82 signs. As such, Eq. 3 can only be applied to PFD emerging from negative density  
83 dependence (e.g. Box 1).

84 An alternative form of positive density dependence sometimes characterized as a  
85 priority effects is an Allee effect [5]. For species exhibiting an Allee effect, there  
86 is a density threshold dividing two alternative stable states, i.e., above which the  
87 population persists and below which the population goes extinct. As such the  
88 alternative stable states arise at the population level, and therefore are distinct  
89 from priority effects that emerge at the community level driven by PFD. Thus,  
90 while Allee effects can effect community composition if inter-specific interactions  
91 maintain species below their Allee threshold, they arise independently of a species'  
92 frequency in a community.

## 93 **Succession and transient priority effects**

94 The notion of priority effects has also been usefully applied to understand the  
95 effects of arrival order on successional dynamics. In these instances, differences  
96 in initial abundance can cause compositional trajectories to vary through time,  
97 even though they may all eventually converge on the same community state. In  
98 naturally ephemeral microbial systems, such as those that develop in floral nectar  
99 or woody debris, this final state might be the local extinction of all community  
100 members following the exhaustion of available resources. Such “alternative tran-  
101 sient states” [2] that are a outcome of resource pre-emption may have downstream  
102 impacts on pollinator preference and decomposition rates, and therefore undoubt-  
103 edly reflect ecological phenomena with meaningful consequences for ecosystem  
104 function. Nevertheless, in the absence of another process sustaining PFD, there  
105 is little scope or rationale to understand these phenomena through the lens of  
106 coexistence theory.

## 107 **Summary**

108 Interest in coexistence theory has been growing steadily, but to date the over-  
109 whelming emphasis has been on the underlying stabilizing mechanisms giving rise  
110 to NFD and stable coexistence. We have illustrated the most accessible approach  
111 to incorporating priority effects mediated through PFD into this body of the-  
112 ory. When priority effects emerge from positive density dependence, or arise in  
113 transient systems, it is currently unclear how to analytically connect them to the  
114 fundamental concepts of coexistence theory.

## 115 **Acknowledgements**

116 We thank Tad Fukami, Tess Grainger, and Daniel Stouffer for comments.

## 117 **Box 1**

118 A classic example of priority effects emerging from PFD comes from Tilman's 1982  
119 monograph [12]. Using the approach taken by [8] to derive niche overlap and the  
120 fitness ratio from Tilman's consumer resource model, PFD generated priority ef-  
121 fects can be partitioned into stabilizing and equalizing components. In Figure 1a,  
122 NFD and coexistence arise due to a combination of intersecting zero net growth  
123 isoclines (ZNGIs), consumption vectors directed towards each species' favored re-  
124 source, and an intermediate resource ratio. As the angle between the consumption  
125 vectors declines to  $\theta_2$  (Fig. 1b), the stabilization potential also declines. The out-  
126 come is competitive exclusion (Fig. 1e). Once the consumption vectors cross and  
127 begin to diverge, each species consumes more of its competitor's favored resource  
128 ( $\theta_3$ , Fig. 1c), setting up the conditions for PFD. However, if the fitness difference  
129 remains sufficiently large, the outcome will still be exclusion irrespective of arrival  
130 order (Fig. 1e). If the resource supply shifts to a more balanced ratio (Fig. 1d),  
131 the fitness inequality is reduced and priority effects emerge (Fig. 1e). This demon-  
132 strates that priority effects are a function of both the stabilization potential and  
133 the fitness inequality.

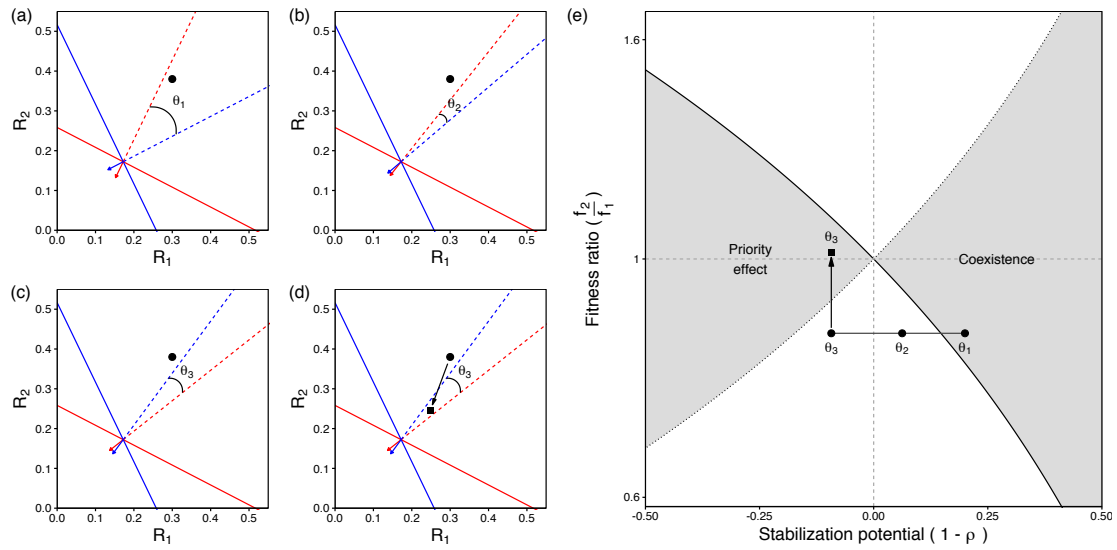

**Figure 1** Effect of (a) changing species' impact vector and resource supply ratio in a consumer-resource model on (e) the fitness ratio and stabilization potential (niche difference) of coexistence theory. In panel (a), the solid red and blue lines are the ZNGIs for each species; the solid lines with arrow heads are the respective impact vectors; the dashed lines are the inverse of the impact vectors; and the black circle and square represent two different supply points that favor blue and red species, respectively. In panel (e), the x-axis represents the stabilization potential ( $1 - \rho$ ) and the y-axis represents the fitness ratio,  $f_2/f_1$ ; the solid and dotted line represents the boundary where  $f_2/f_1$  equals to  $\rho$  and  $1/\rho$ , respectively; and the right and left gray shaded area indicates the coexistence and priority effect region, respectively. The angles given by  $\theta_{1-3}$  in (a-d) correspond to the respective  $\theta_{1-3}$  in (e). Note that the y-axis is on log-scale.



## 134 References

- 135 [1] Chase, J.M. (2003) Community assembly: when should history matter? *Oe-*  
136 *cologia* 136, 489–498
- 137 [2] Fukami, T. (2015) Historical contingency in community assembly: integrating  
138 niches, species pools, and priority effects. *Annu. Rev. Ecol. Evol. Syst.* 46,  
139 1–23
- 140 [3] Lewontin, R.C. (1969) The meaning of stability. In *Brookhaven symposia in*  
141 *biology*, vol. 22. p. 13
- 142 [4] May, R.M. (1971) Stability in multispecies community models. *Mathematical*  
143 *Biosciences* 12, 59–79
- 144 [5] Petraitis, P. (2013) *Multiple stable states in natural ecosystems*. OUP Oxford
- 145 [6] Mordecai, E.A. (2011) Pathogen impacts on plant communities: unifying the-  
146 *ory, concepts, and empirical work. Ecol. Monograph* 81, 429–441
- 147 [7] Fukami, T. *et al.* (2016) A framework for priority effects. *Journal of Vegetation*  
148 *Science* 27, 655–657
- 149 [8] Letten, A.D. *et al.* (2017) Linking modern coexistence theory and contempo-  
150 *rary niche theory. Ecological Monographs* 87, 161–177
- 151 [9] Chesson, P. (2000) Mechanisms of maintenance of species diversity. *Annu.*  
152 *Rev. Ecol. Syst.* 31, 343–366
- 153 [10] Chesson, P. (1990) MacArthur’s consumer-resource model. *Theor. Popul.*  
154 *Biol.* 37, 26–38
- 155 [11] Chesson, P. (2013) Species Competition and Predation. In R. Leemans, ed.,  
156 *Ecological Systems*. Springer New York, pp. 223–256
- 157 [12] Tilman, D. (1982) *Resource Competition and Community Structure. (Mpb-*  
158 *17)*. Princeton University Press, Princeton, NJ, USA
- 159 [13] Chesson, P. (2009) Scale transition theory with special reference to species  
160 *coexistence in a variable environment. Journal of Biological Dynamics* 3,  
161 149–163
